Development 135, 3970 (2008) doi:10.1242/dev.032011

**PIP5K-dependent production of PIP2 sustains microtubule organization to establish polarized transport in the *Drosophila* oocyte**

**Louis Gervais, Sandra Claret, Jens Januschke, Siegfried Roth and Antoine Guichet**

There was an error published in the ePress version of *Development* **135**, 3829-3838 on 23rd October 2008.

The first name and surname of Sandra Claret were reversed. The correct name appears above.

The final online and print versions are correct.

The authors apologise to readers for this mistake.
